# Supplementary material
Source: PubMed Central journal article supplement (PMC5429884)
Supplement: mol-23-16_170_Akbar_Suppl.pdf [file mol-23-16_170_Akbar_Suppl.pdf]

Supplemental Data

**$\alpha$ -1 Antitrypsin Inhibits RANKL-induced Osteoclast Formation and Functions**

Mohammad Ahsanul Akbar,<sup>1</sup> David Nardo,<sup>1</sup> Mong-Jen Chen,<sup>1</sup> Ahmed S Elshikha,<sup>1</sup> Rubina Ahamed,<sup>1</sup> Eslam M Elsayed,<sup>1,4</sup> Claire Bigot,<sup>1</sup> L Shannon Holliday,<sup>2,3</sup> and Sihong Song<sup>1</sup>

Online address: <http://www.molmed.org>

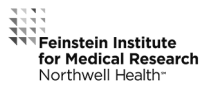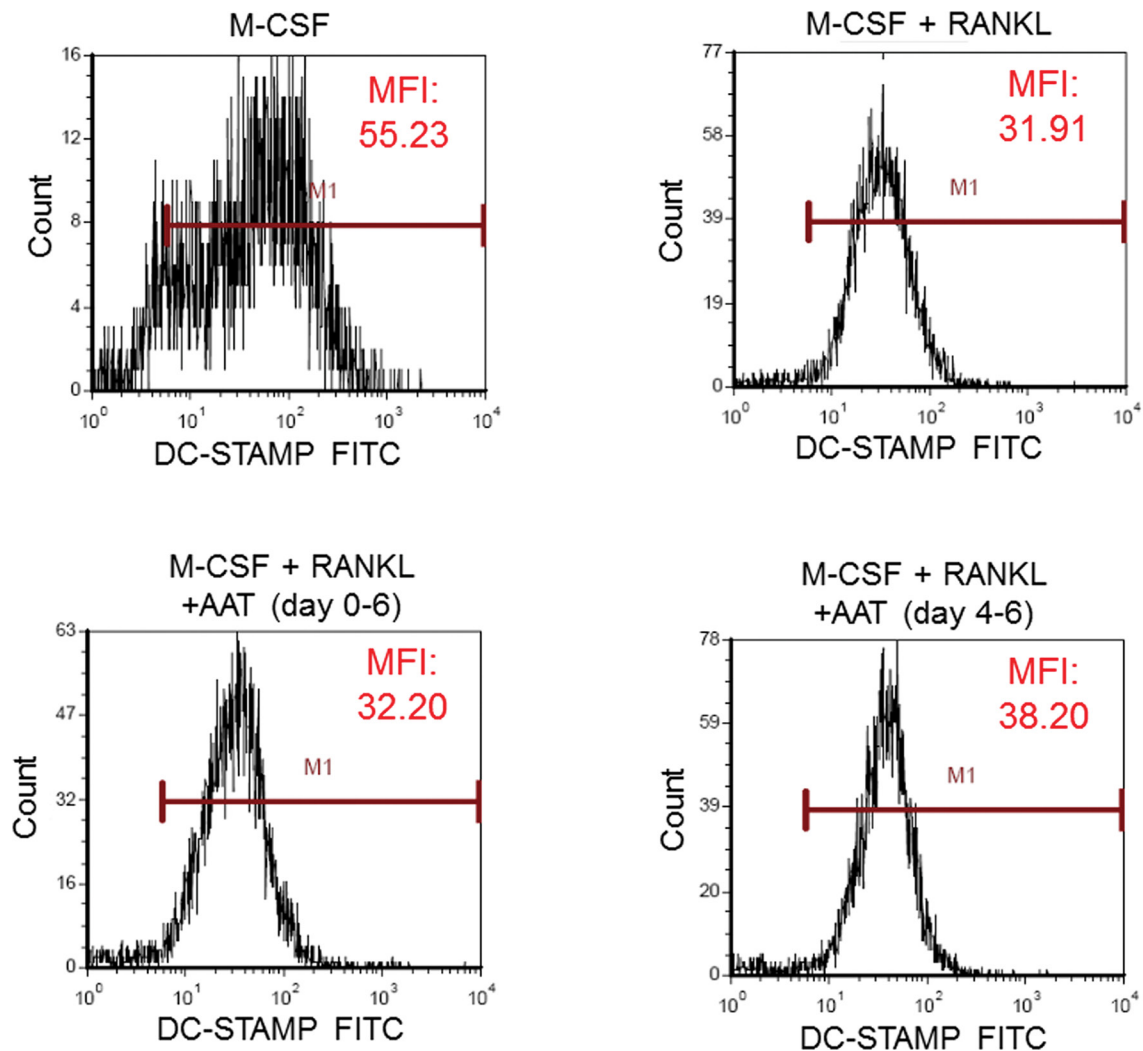

**Supplementary Figure S1.** Representative histogram of cell surface DC-STAMP detected by flow cytometry. The quantitative analysis is presented in Figure 5B.

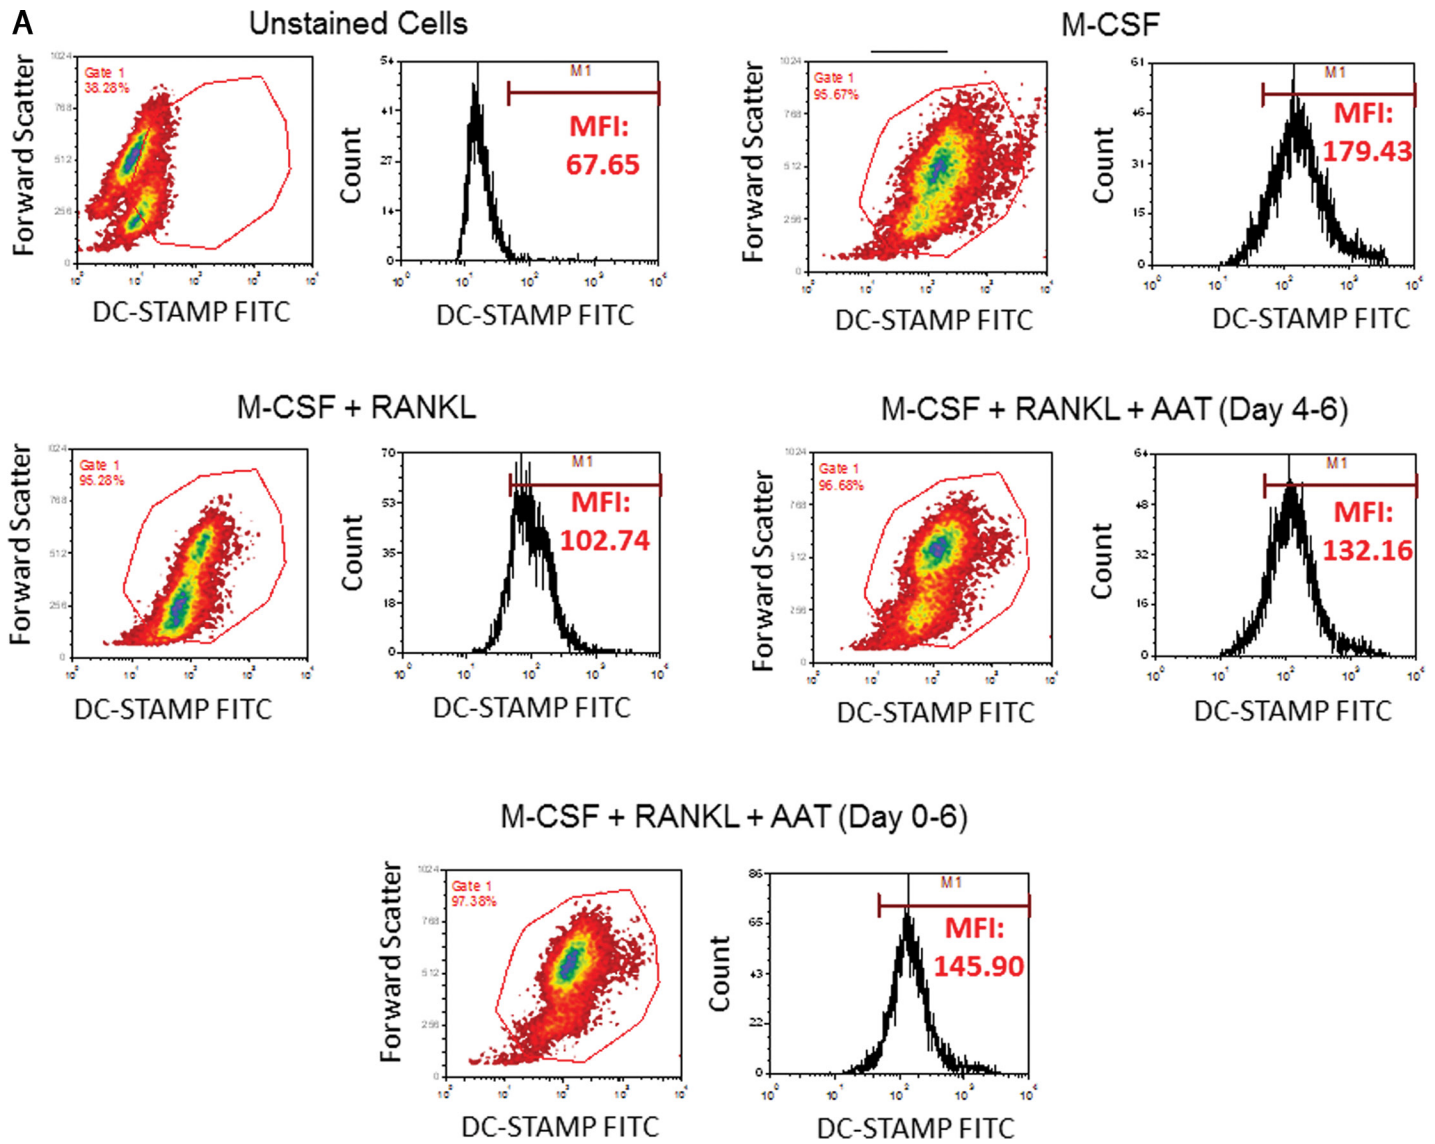

**Supplementary Figure S2.** Detection of intracellular DC-STAMP. (A) Representative histogram of intracellular DC-STAMP detected by flow cytometry. The quantitative analysis is presented in Figure 5D. Gating was made considering both small and large cell populations. (B) Mean fluorescence intensity of intracellular DC-STAMP detected in large cells. Upper left figure is quantitative data gated for large cells only. The rest of the figures are representative flow cytometry histograms for indicated groups. (C) Mean fluorescence intensity of intracellular DC-STAMP in small cells. Upper left figure is the quantitative data gated for small cells only. The rest of the figures are representative flow cytometry histograms for indicated groups. **Q6**

Continued on next page

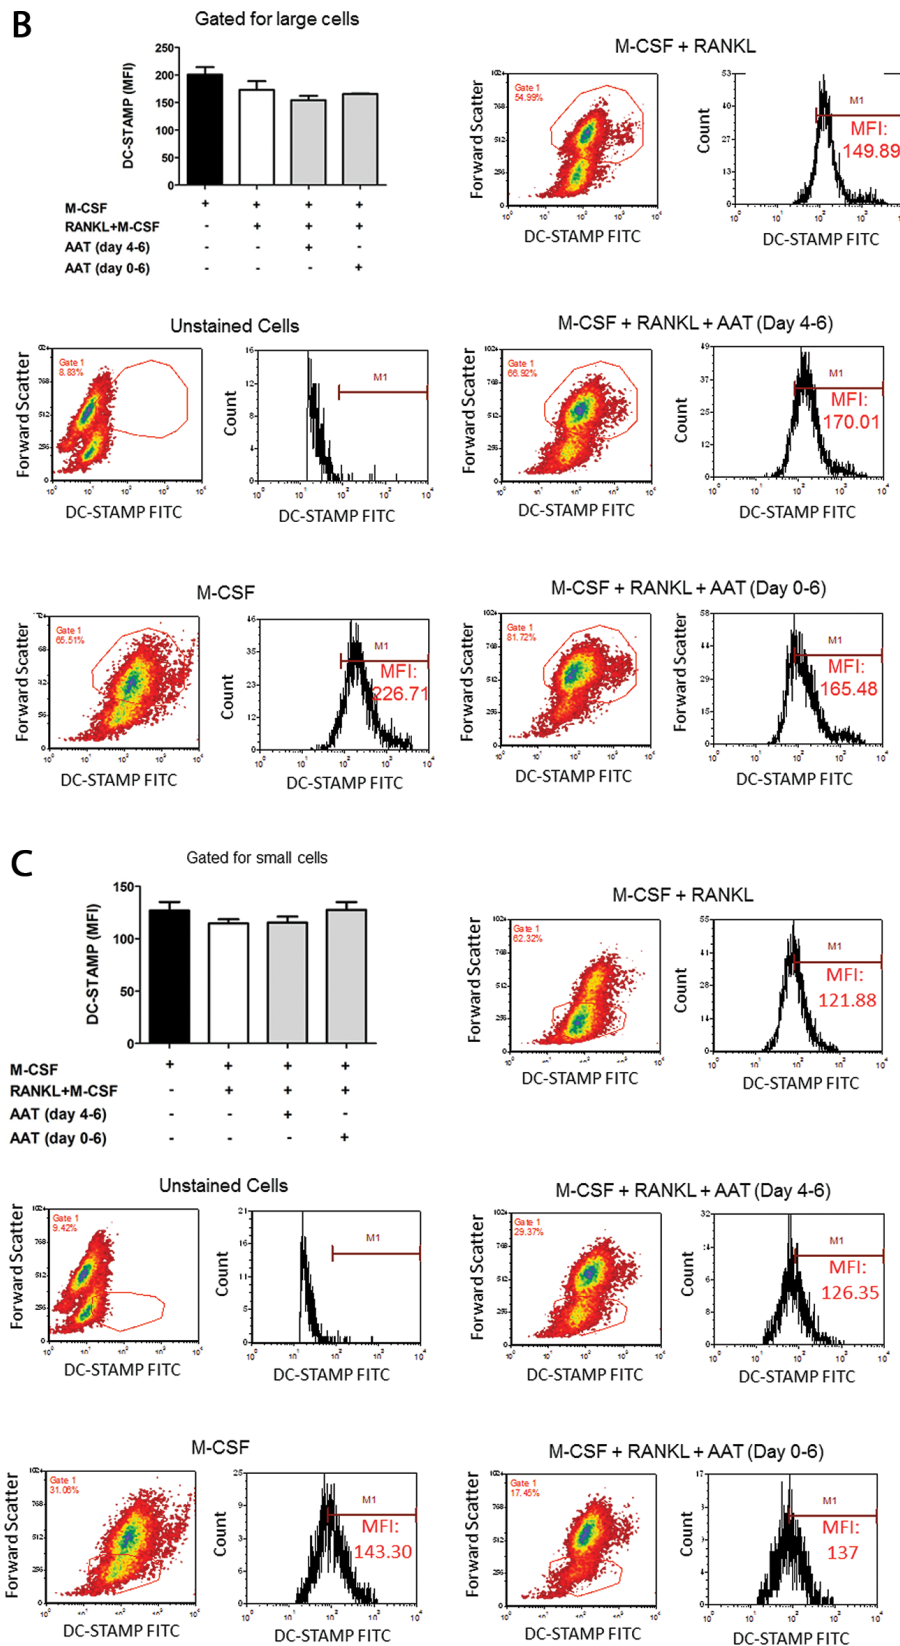

Supplementary Figure S2. *Continued.*
